# Supplementary material for: Effects of Omega-3 Polyunsaturated Fatty Acids Intake on Vasomotor Symptoms, Sleep Quality and Depression in Postmenopausal Women: A Systematic Review
Source: MDPI journal article supplement (doi:10.3390/nu15194231), 2023-09-30
Supplement: s1 [file s1]

**Table S1. PRISMA 2020 Main Checklist**

| Topic                          | No. | Item                                                                                                                                                                                                                                                                                                 | Location where item is reported |
|--------------------------------|-----|------------------------------------------------------------------------------------------------------------------------------------------------------------------------------------------------------------------------------------------------------------------------------------------------------|---------------------------------|
| <b>TITLE</b>                   |     |                                                                                                                                                                                                                                                                                                      |                                 |
| <b>Title</b>                   | 1   | Identify the report as a systematic review.                                                                                                                                                                                                                                                          | 1                               |
| <b>ABSTRACT</b>                |     |                                                                                                                                                                                                                                                                                                      |                                 |
| <b>Abstract</b>                | 2   | See the PRISMA 2020 for Abstracts checklist                                                                                                                                                                                                                                                          | 1                               |
| <b>INTRODUCTION</b>            |     |                                                                                                                                                                                                                                                                                                      |                                 |
| <b>Rationale</b>               | 3   | Describe the rationale for the review in the context of existing knowledge.                                                                                                                                                                                                                          | 2-3                             |
| <b>Objectives</b>              | 4   | Provide an explicit statement of the objective(s) or question(s) the review addresses.                                                                                                                                                                                                               | 2-3                             |
| <b>METHODS</b>                 |     |                                                                                                                                                                                                                                                                                                      |                                 |
| <b>Eligibility criteria</b>    | 5   | Specify the inclusion and exclusion criteria for the review and how studies were grouped for the syntheses.                                                                                                                                                                                          | 4-5                             |
| <b>Information sources</b>     | 6   | Specify all databases, registers, websites, organisations, reference lists and other sources searched or consulted to identify studies. Specify the date when each source was last searched or consulted.                                                                                            | 4 and supplementary data        |
| <b>Search strategy</b>         | 7   | Present the full search strategies for all databases, registers and websites, including any filters and limits used.                                                                                                                                                                                 | 4 and supplementary data        |
| <b>Selection process</b>       | 8   | Specify the methods used to decide whether a study met the inclusion criteria of the review, including how many reviewers screened each record and each report retrieved, whether they worked independently, and if applicable, details of automation tools used in the process.                     | 5 and supplementary data        |
| <b>Data collection process</b> | 9   | Specify the methods used to collect data from reports, including how many reviewers collected data from each report, whether they worked independently, any processes for obtaining or confirming data from study investigators, and if applicable, details of automation tools used in the process. | 5                               |

| Topic                                | No. | Item                                                                                                                                                                                                                                                                          | Location where item is reported |
|--------------------------------------|-----|-------------------------------------------------------------------------------------------------------------------------------------------------------------------------------------------------------------------------------------------------------------------------------|---------------------------------|
| <b>Data items</b>                    | 10a | List and define all outcomes for which data were sought. Specify whether all results that were compatible with each outcome domain in each study were sought (e.g. for all measures, time points, analyses), and if not, the methods used to decide which results to collect. | NA                              |
|                                      | 10b | List and define all other variables for which data were sought (e.g. participant and intervention characteristics, funding sources). Describe any assumptions made about any missing or unclear information.                                                                  | 4-5                             |
| <b>Study risk of bias assessment</b> | 11  | Specify the methods used to assess risk of bias in the included studies, including details of the tool(s) used, how many reviewers assessed each study and whether they worked independently, and if applicable, details of automation tools used in the process.             | 5                               |
| <b>Effect measures</b>               | 12  | Specify for each outcome the effect measure(s) (e.g. risk ratio, mean difference) used in the synthesis or presentation of results.                                                                                                                                           | NA                              |
| <b>Synthesis methods</b>             | 13a | Describe the processes used to decide which studies were eligible for each synthesis (e.g. tabulating the study intervention characteristics and comparing against the planned groups for each synthesis (item 5)).                                                           | 7-8                             |
|                                      | 13b | Describe any methods required to prepare the data for presentation or synthesis, such as handling of missing summary statistics, or data conversions.                                                                                                                         | NA                              |
|                                      | 13c | Describe any methods used to tabulate or visually display results of individual studies and syntheses.                                                                                                                                                                        | 7-8                             |
|                                      | 13d | Describe any methods used to synthesize results and provide a rationale for the choice(s). If meta-analysis was performed, describe the model(s), method(s) to identify the presence and extent of statistical heterogeneity, and software package(s) used.                   | NA                              |
|                                      | 13e | Describe any methods used to explore possible causes of heterogeneity among study results (e.g. subgroup analysis, meta-regression).                                                                                                                                          | NA                              |

| Topic                                | No. | Item                                                                                                                                                                                                                                                                                 | Location where item is reported |
|--------------------------------------|-----|--------------------------------------------------------------------------------------------------------------------------------------------------------------------------------------------------------------------------------------------------------------------------------------|---------------------------------|
| <b>Reporting bias assessment</b>     | 13f | Describe any sensitivity analyses conducted to assess robustness of the synthesized results.                                                                                                                                                                                         | NA                              |
|                                      | 14  | Describe any methods used to assess risk of bias due to missing results in a synthesis (arising from reporting biases).                                                                                                                                                              | 5                               |
| <b>Certainty assessment</b>          | 15  | Describe any methods used to assess certainty (or confidence) in the body of evidence for an outcome.                                                                                                                                                                                | NA                              |
| <b>RESULTS</b>                       |     |                                                                                                                                                                                                                                                                                      |                                 |
| <b>Study selection</b>               | 16a | Describe the results of the search and selection process, from the number of records identified in the search to the number of studies included in the review, ideally using a flow diagram.                                                                                         | 5-6 and figure 2                |
|                                      | 16b | Cite studies that might appear to meet the inclusion criteria, but which were excluded, and explain why they were excluded.                                                                                                                                                          | 6 and supplementary data        |
| <b>Study characteristics</b>         | 17  | Cite each included study and present its characteristics.                                                                                                                                                                                                                            | 6-9 and Table 2                 |
| <b>Risk of bias in studies</b>       | 18  | Present assessments of risk of bias for each included study.                                                                                                                                                                                                                         | 9-10                            |
| <b>Results of individual studies</b> | 19  | For all outcomes, present, for each study: (a) summary statistics for each group (where appropriate) and (b) an effect estimate and its precision (e.g. confidence/credible interval), ideally using structured tables or plots.                                                     | NA                              |
| <b>Results of syntheses</b>          | 20a | For each synthesis, briefly summarise the characteristics and risk of bias among contributing studies.                                                                                                                                                                               | 9-10 and figure 3               |
|                                      | 20b | Present results of all statistical syntheses conducted. If meta-analysis was done, present for each the summary estimate and its precision (e.g. confidence/credible interval) and measures of statistical heterogeneity. If comparing groups, describe the direction of the effect. | NA                              |
|                                      | 20c | Present results of all investigations of possible causes of heterogeneity among study results.                                                                                                                                                                                       | NA                              |

| Topic                            | No. | Item                                                                                                                                           | Location where item is reported |
|----------------------------------|-----|------------------------------------------------------------------------------------------------------------------------------------------------|---------------------------------|
| <b>Reporting biases</b>          | 20d | Present results of all sensitivity analyses conducted to assess the robustness of the synthesized results.                                     | NA                              |
|                                  | 21  | Present assessments of risk of bias due to missing results (arising from reporting biases) for each synthesis assessed.                        | 9-10                            |
| <b>Certainty of evidence</b>     | 22  | Present assessments of certainty (or confidence) in the body of evidence for each outcome assessed.                                            | NA                              |
| <b>DISCUSSION</b>                |     |                                                                                                                                                |                                 |
| <b>Discussion</b>                | 23a | Provide a general interpretation of the results in the context of other evidence.                                                              | 10-12                           |
|                                  | 23b | Discuss any limitations of the evidence included in the review.                                                                                | 13-14                           |
|                                  | 23c | Discuss any limitations of the review processes used.                                                                                          | 13-14                           |
|                                  | 23d | Discuss implications of the results for practice, policy, and future research.                                                                 | 13-14                           |
| <b>OTHER INFORMATION</b>         |     |                                                                                                                                                |                                 |
| <b>Registration and protocol</b> | 24a | Provide registration information for the review, including register name and registration number, or state that the review was not registered. | 4                               |
|                                  | 24b | Indicate where the review protocol can be accessed, or state that a protocol was not prepared.                                                 | 4                               |
|                                  | 24c | Describe and explain any amendments to information provided at registration or in the protocol.                                                | NA                              |
| <b>Support</b>                   | 25  | Describe sources of financial or non-financial support for the review, and the role of the funders or sponsors in the review.                  | NA                              |
| <b>Competing interests</b>       | 26  | Declare any competing interests of review authors.                                                                                             | NA                              |

| Topic                                                 | No. | Item                                                                                                                                                                                                                                       | Location where item is reported |
|-------------------------------------------------------|-----|--------------------------------------------------------------------------------------------------------------------------------------------------------------------------------------------------------------------------------------------|---------------------------------|
| <b>Availability of data, code and other materials</b> | 27  | Report which of the following are publicly available and where they can be found: template data collection forms; data extracted from included studies; data used for all analyses; analytic code; any other materials used in the review. | Supplementary data              |

### PRISMA Abstract Checklist

| Topic                       | No. | Item                                                                                                                           | Reported? |
|-----------------------------|-----|--------------------------------------------------------------------------------------------------------------------------------|-----------|
| <b>TITLE</b>                |     |                                                                                                                                |           |
| <b>Title</b>                | 1   | Identify the report as a systematic review.                                                                                    | Yes       |
| <b>BACKGROUND</b>           |     |                                                                                                                                |           |
| <b>Objectives</b>           | 2   | Provide an explicit statement of the main objective(s) or question(s) the review addresses.                                    | Yes       |
| <b>METHODS</b>              |     |                                                                                                                                |           |
| <b>Eligibility criteria</b> | 3   | Specify the inclusion and exclusion criteria for the review.                                                                   | Yes       |
| <b>Information sources</b>  | 4   | Specify the information sources (e.g. databases, registers) used to identify studies and the date when each was last searched. | Yes       |
| <b>Risk of bias</b>         | 5   | Specify the methods used to assess risk of bias in the included studies.                                                       | Yes       |
| <b>Synthesis of results</b> | 6   | Specify the methods used to present and synthesize results.                                                                    | Yes       |
| <b>RESULTS</b>              |     |                                                                                                                                |           |
| <b>Included studies</b>     | 7   | Give the total number of included studies and participants and summarise relevant characteristics of studies.                  | Yes       |

| Topic                          | No. | Item                                                                                                                                                                                                                                                                                                  | Reported? |
|--------------------------------|-----|-------------------------------------------------------------------------------------------------------------------------------------------------------------------------------------------------------------------------------------------------------------------------------------------------------|-----------|
| <b>Synthesis of results</b>    | 8   | Present results for main outcomes, preferably indicating the number of included studies and participants for each. If meta-analysis was done, report the summary estimate and confidence/credible interval. If comparing groups, indicate the direction of the effect (i.e. which group is favoured). | Yes       |
| <b>DISCUSSION</b>              |     |                                                                                                                                                                                                                                                                                                       |           |
| <b>Limitations of evidence</b> | 9   | Provide a brief summary of the limitations of the evidence included in the review (e.g. study risk of bias, inconsistency and imprecision).                                                                                                                                                           | Yes       |
| <b>Interpretation</b>          | 10  | Provide a general interpretation of the results and important implications.                                                                                                                                                                                                                           | Yes       |
| <b>OTHER</b>                   |     |                                                                                                                                                                                                                                                                                                       |           |
| <b>Funding</b>                 | 11  | Specify the primary source of funding for the review.                                                                                                                                                                                                                                                 | No        |
| <b>Registration</b>            | 12  | Provide the register name and registration number.                                                                                                                                                                                                                                                    | Yes       |

*From:* Page MJ, McKenzie JE, Bossuyt PM, Boutron I, Hoffmann TC, Mulrow CD, et al. The PRISMA 2020 statement: an updated guideline for reporting systematic reviews. MetaArXiv. 2020, September 14. DOI: 10.31222/osf.io/v7gm2. For more information, visit: [www.prisma-statement.org](http://www.prisma-statement.org)

**Table S2. Search strategy**

| <b>Database</b>  | <b>Search Strategies</b>                                                                                                                                                                                             | <b>Identified studies</b> |
|------------------|----------------------------------------------------------------------------------------------------------------------------------------------------------------------------------------------------------------------|---------------------------|
| Cochrane Library | ("omega-3" OR "fish oils" OR "PUFA") AND ("menopause" OR "hot flashes" OR "night sweats" OR "vasomotor") AND ("insomnia" OR "sleep quality" OR "depression") in Title Abstract Keyword -                             | 25                        |
| Web of Science   | "Omega 3" OR "fish oils" OR "PUFA" (Abstract) and "Menopause" OR "hot flashes" OR "night sweats" OR "Vasomotor" (Abstract) and "insomnia" OR "sleep quality" OR "depression" (Abstract) and Article (Document Types) | 10                        |
| PubMed           | ((("omega-3" OR "fish oils" OR "PUFA")) AND (("menopause" OR "hot flashes" OR "night sweats" OR "vasomotor")))) AND (("insomnia" OR "sleep quality" OR "depression"))                                                | 27                        |
| Embase           | ('omega-3' OR 'fish oils' OR 'PUFA') AND ('menopause' OR 'hot flashes' OR 'night sweats' OR 'vasomotor') AND ('insomnia' OR 'sleep quality' OR 'depression')                                                         | 79                        |
| CINAHL           | ("omega-3" OR "fish oils" OR "PUFA") AND ("menopause" OR "hot flashes" OR "night sweats" OR "vasomotor") AND ("insomnia" OR "sleep quality" OR "depression")                                                         | 18                        |
| SCOPUS           | ("omega-3" OR "fish oil") AND ("menopause" OR "hot flashes" OR "night sweats" OR "vasomotor") AND ("insomnia" OR "sleep quality" OR "depression")                                                                    | 4                         |

**Table S3. List of excluded studies**

| <b>No.</b> | <b>Author</b>                                                                           | <b>Title</b>                                                                                                                                                                                         | <b>Exclusion</b> |
|------------|-----------------------------------------------------------------------------------------|------------------------------------------------------------------------------------------------------------------------------------------------------------------------------------------------------|------------------|
| 1          | Rudin DO                                                                                | The dominant diseases of modernized societies as omega-3 essential fatty acid deficiency syndrome: Substrate beriberi                                                                                | Article mismatch |
| 2          | Gesteiro E, Megía A, Guadalupe-Grau A, Fernandez-Veledo S, Vendrell J, González-Gross M | Early identification of metabolic syndrome risk: A review of reviews and proposal for defining pre-metabolic syndrome status                                                                         | Article mismatch |
| 3          | Mohammady M, Janani L, Jahanfar S, Mousavi MS                                           | Effect of omega-3 supplements on vasomotor symptoms in menopausal women: A systematic review and meta-analysis                                                                                       | Article mismatch |
| 4          | Grigolon RB, Ceolin G, Deng Y, Bambokian A, Koning E, Fabe J, et al                     | Effects of nutritional interventions on the severity of depressive and anxiety symptoms of women in the menopausal transition and menopause: a systematic review, meta-analysis, and meta-regression | Article mismatch |
| 5          | Reed SD, Lacroix AZ, Anderson GL, Ensrud KE, Caan B, Carpenter JS, et al                | Lights on MsFLASH: A review of contributions                                                                                                                                                         | Article mismatch |
| 6          | Crandall CJ, Mehta JM, Manson JE                                                        | Management of Menopausal Symptoms: A Review                                                                                                                                                          | Article mismatch |
| 7          | Wilson MMG                                                                              | Menopause                                                                                                                                                                                            | Article mismatch |
| 8          | Murray MT                                                                               | MENOPAUSE & ANXIETY                                                                                                                                                                                  | Article mismatch |
| 9          | Richardson MK                                                                           | Menopause Strategies: Finding lasting answers for symptoms and health: Eliminating hot flashes-still not a slam dunk! Menopause                                                                      | Article mismatch |
| 10         | Newton KM, Carpenter JS, Guthrie KA, Anderson GL, Caan B, Cohen LS, et al               | Methods for the design of vasomotor symptom trials: The Menopausal Strategies: Finding lasting answers to symptoms and health network                                                                | Article mismatch |
| 11         | Ciappolino V, Mazzocchi A, Enrico P, Syrén ML, Delvecchio G, Agostoni C, et al          | N-3 Polyunsaturated Fatty Acids in Menopausal Transition: A Systematic Review of Depressive and Cognitive Disorders with Accompanying Vasomotor Symptoms                                             | Article mismatch |
| 12         | Decandia D, Landolfo E, Sacchetti S, Gelfo F, Petrosini L, Cutuli D                     | n-3 PUFA Improve Emotion and Cognition during Menopause: A Systematic Review                                                                                                                         | Article mismatch |



|    |                                                                                 |                                                                                                                                                                                                             |                         |
|----|---------------------------------------------------------------------------------|-------------------------------------------------------------------------------------------------------------------------------------------------------------------------------------------------------------|-------------------------|
| 13 | Hall E, Frey BN, Soares CN                                                      | Non-hormonal treatment strategies for vasomotor symptoms: A critical review                                                                                                                                 | Article mismatch        |
| 14 | Brandon AR, Crowley SK, Gordon JL, Girdler SS                                   | Nonpharmacologic Treatments for Depression Related to Reproductive Events                                                                                                                                   | Article mismatch        |
| 15 | Sánchez-Borrego R, von Schacky C, Osorio MJA, Llaneza P, Pinto X, Losa F, et al | Recommendations of the Spanish Menopause Society on the consumption of omega-3 polyunsaturated fatty acids by postmenopausal women                                                                          | Article mismatch        |
| 16 | Albertazzi P                                                                    | A review of non-hormonal options for the relief of menopausal symptoms                                                                                                                                      | Article mismatch        |
| 17 | Tester J                                                                        | Reviews of medical journal articles                                                                                                                                                                         | Article mismatch        |
| 18 | Yelland S, Steenson S, Creedon A, Stanner S                                     | The role of diet in managing menopausal symptoms: A narrative review                                                                                                                                        | Article mismatch        |
| 19 | Landis CA, Woods NF                                                             | Seasonality and symptoms                                                                                                                                                                                    | Article mismatch        |
| 20 | Davies A                                                                        | A systematic review of the effect of omega-3 long chain polyunsaturated fatty acids on menopausal symptoms (vasomotor, depression and insomnia) of women going through the menopause transition             | Article mismatch        |
| 21 | Grigoriadis S, Kennedy S, Robinson G, VonderPorten E, Mamisashvili L, Peer M    | A systematic review of treatments for depression in perimenopausal and postmenopausal women                                                                                                                 | Article mismatch        |
| 22 | Tal JZ, Suh SA, Dowdle CL, Nowakowski S                                         | Treatment of insomnia, insomnia symptoms, and obstructive sleep apnea during and after menopause: Therapeutic approaches                                                                                    | Article mismatch        |
| 23 | Saldeen P, Saldeen T                                                            | Women and omega-3 Fatty acids                                                                                                                                                                               | Article mismatch        |
| 24 | BMS Annual Scientific Conference 2022                                           | Post Reproductive Health                                                                                                                                                                                    | Conference paper        |
| 25 | Reed SD, La Croix AZ, Guthrie KA, Anderson G, Ensrud K, Caan B, et al           | A Decade of MsFLASH Findings - Time to Get the Word Out                                                                                                                                                     | Conference paper        |
| 26 | Masoumi SZ                                                                      | Comperession with the combined effects of omega _3 and citalopram for depression during menopause in postmenopausal women referred to health centers in Hamadan city in 1391: a double-blind clinical trial | duplicate               |
| 27 | Irct2013052113405N                                                              | Effect of omega3 in depression in menopause                                                                                                                                                                 | duplicate               |
| 28 | Irct2017011131880N                                                              | The Comparison of the Effect of Omega3 and Folic Acid Oral Tablet on Hot Flashes in Menopausal Women                                                                                                        | Full text not available |
| 29 | Tadayon Najaf Abadi M, Shalika Z, Abedi P                                       | The impact of Omga-3 fatty acids on depression of post menopausal women                                                                                                                                     | Full text not available |

|    |                                                                                                 |                                                                                                                                                                             |                          |
|----|-------------------------------------------------------------------------------------------------|-----------------------------------------------------------------------------------------------------------------------------------------------------------------------------|--------------------------|
| 30 | Nct                                                                                             | Omega-3 for Peri- and Postmenopausal Depression                                                                                                                             | Full text not available  |
| 31 | Li D, Wu Q, Xu W, Zheng H, Tong Y, Li Y                                                         | Dietary manganese intake is inversely associated with depressive symptoms in midlife women: A cross-sectional study                                                         | Irrelevant Intervention  |
| 32 | Verde L, Barrea L, Vetrani C, Frias-Toral E, Chapela SP, Jayawardena R, et al                   | Chronotype and Sleep Quality in Obesity: How Do They Change After Menopause? Current Obesity Reports                                                                        | No relevant outcome data |
| 33 | Deligiannidis KM, Freeman MP                                                                    | Complementary and Alternative Medicine for the Treatment of Depressive Disorders in Women                                                                                   | No relevant outcome data |
| 34 | Özcan H, Çakmak S, Salman E                                                                     | Complementary and alternative medicine methods used for sleep disturbance in menopause                                                                                      | No relevant outcome data |
| 35 | Lucas M, Dodin S, Poulin MJ, Merette C                                                          | Does omega-3 improve menopausal symptoms? Agro Food Industry Hi-Tech                                                                                                        | No relevant outcome data |
| 36 | Irct2012071410281N                                                                              | Effect of Omega 3 supplementation in women with polycystic ovary syndrome                                                                                                   | No relevant outcome data |
| 37 | Irct201112318564N                                                                               | Effect of omega3 supplementation in women with polycystic ovary syndrome                                                                                                    | No relevant outcome data |
| 38 | Diem SJ, LaCroix AZ, Reed SD, Larson JC, Newton KM, Ensrud KE, et al                            | Effects of pharmacologic and nonpharmacologic interventions on menopause-related quality of life: a pooled analysis of individual participant data from four MsFLASH trials | No relevant outcome data |
| 39 | Newton KM, Reed SD, Guthrie KA, Sherman KJ, Booth-LaForce C, Caan B, et al                      | Efficacy of yoga for vasomotor symptoms: a randomized controlled trial                                                                                                      | No relevant outcome data |
| 40 | Carpenter JS, Tisdale JE, Larson JC, Sheng Y, Chen CX, Von Ah D, et al                          | MsFLASH analysis of diurnal salivary cortisol and palpitations in peri- and postmenopausal women                                                                            | No relevant outcome data |
| 41 | LaCroix AZ, Joffe H, Cohen LS, Newton KM, Reed SD, Guthrie KA, et al                            | The MsFLASH research network: Latest findings                                                                                                                               | No relevant outcome data |
| 42 | García-Montero C, Ortega MA, Alvarez-Mon MA, Fraile-Martinez O, Romero-Bazán A, Lahera G, et al | The Problem of Malnutrition Associated with Major Depressive Disorder from a Sex-Gender Perspective                                                                         | No relevant outcome data |
| 43 | Shikh EV, Makhova AA                                                                            | Protective effects of omega-3 polyunsaturated fatty acids in female health                                                                                                  | No relevant outcome data |
| 44 | Okereke OI                                                                                      | Vitamin D and Omega-3 Fatty Acids: Do They Have Benefits for Mood, Depression, or Cognition? Menopause                                                                      | No relevant outcome data |

|    |                                                                                |                                                                                                                                                     |                    |
|----|--------------------------------------------------------------------------------|-----------------------------------------------------------------------------------------------------------------------------------------------------|--------------------|
| 45 | Von Hagens C, Reinhard-Hennch B, Strowitzki T                                  | Alternative therapies for menopausal women                                                                                                          | Not English        |
| 46 | Chae M, Park K                                                                 | Association between dietary omega-3 fatty acid intake and depression in postmenopausal women                                                        | Not RCT            |
| 47 | Terauchi M, Odai T, Hirose A, Kato K, Miyasaka N                               | Chilliness in Japanese middle-aged women is associated with anxiety and low n-3 fatty acid intake                                                   | Not RCT            |
| 48 | Terauchi M, Odai T, Hirose A, Kato K, Akiyoshi M, Miyasaka N                   | Chilliness in Japanese middle-aged women is associated with low intake of n-3 fatty acids: a cross-sectional study                                  | Not RCT            |
| 49 | Otte JL, Rand KL, Landis CA, Paudel ML, Newton KM, Woods N, et al              | Confirmatory factor analysis of the Pittsburgh Sleep Quality Index in women with hot flashes                                                        | Not RCT            |
| 50 | Abshirini M, Siassi F, Koohdani F, Qorbani M, Khosravi S, Aslani Z, et al      | Higher intake of dietary n-3 PUFA and lower MUFA are associated with fewer menopausal symptoms                                                      | Not RCT            |
| 51 | Carpenter J, Woods NF, Otte J, Guthrie K, Hohensee C, Newton KM, et al         | MsFLASH participants' priorities for alleviating menopausal symptoms                                                                                | Not RCT            |
| 52 | Freeman MP, Hibbeln JR, Silver M, Hirschberg AM, Wang B, Yule AM, et al        | Omega-3 fatty acids for major depressive disorder associated with the menopausal transition: a preliminary open trial                               | Not RCT            |
| 53 | Oldra CM, Benvegnú DM, Silva DRP, Wendt GW, Vieira AP                          | Relationships between depression and food intake in climacteric women                                                                               | Not RCT            |
| 54 | Shon J, Seong Y, Choi Y, Kim Y, Cho MS, Ha E, et al                            | Meal-Based Intervention on Health Promotion in Middle-Aged Women: A Pilot Study                                                                     | Pilot study        |
| 55 | Jin Y, Kim TH, Park Y                                                          | Association between erythrocyte levels of n-3 polyunsaturated fatty acids and depression in postmenopausal women using or not using hormone therapy | Subject irrelevant |
| 56 | Da Rocha RVO, Martins MIM, Antunes FTT, Martins MG, Klein AB, Corrêa DS, et al | Behavioral, Oxidative, and Biochemical Effects of Omega-3 on an Ovariectomized Rat Model of Menopause                                               | Subject irrelevant |
| 57 | Irct201108237405N                                                              | Comparison of the therapeutic effects of omega3 fatty acids and Rose damascena on premenstrual syndrom                                              | Subject irrelevant |
| 58 | Barnes C, Mitchell P                                                           | Considerations in the management of bipolar disorder in women                                                                                       | Subject irrelevant |
| 59 | Khalili M, Karimi H, Sadri S                                                   | Effect of fish oil supplement and weight loss diet on depression in obese women                                                                     | Subject irrelevant |

|    |                                                                                        |                                                                                                                                                                   |                    |
|----|----------------------------------------------------------------------------------------|-------------------------------------------------------------------------------------------------------------------------------------------------------------------|--------------------|
| 60 | Tsuboi H, Sakakibara H, Matsunaga M, Tatsumi A, Yamakawa-Kobayashi K, Yoshida N, et al | Omega-3 eicosapentaenoic acid is related to happiness and a sense of fulfillment—a study among female nursing workers                                             | Subject irrelevant |
| 61 | Rhee EJ, Kim HC, Kim JH, Lee EY, Kim BJ, Kim EM, et al                                 | 2018 Guidelines for the Management of Dyslipidemia in Korea                                                                                                       | Unrelated          |
| 62 | Lim PHC                                                                                | ABC's of managing andropause & somatopause for the urologist                                                                                                      | Unrelated          |
| 63 | Turner L                                                                               | The Best Diet for Menopause                                                                                                                                       | Unrelated          |
| 64 | Barton DL, Loprinzi C, Jatoi A, Vincent A, Limburg P, Bauer B, et al                   | Can complementary and alternative medicine clinical cancer research be successfully accomplished? The Mayo Clinic-North Central Cancer Treatment Group experience | Unrelated          |
| 65 | MacQueen GM, Frey BN, Ismail Z, Jaworska N, Steiner M, Lieshout RJV, et al             | Canadian Network for Mood and Anxiety Treatments (CANMAT) 2016 clinical guidelines for the management of adults with major depressive disorder: Section 6         | Unrelated          |
| 66 | Mehta PK, Wenger NK                                                                    | Coronary heart disease in women: Battle is won, but the war remains                                                                                               | Unrelated          |
| 67 | Prakash S                                                                              | Current perspective of growth differentiation factor- 15 in changing of lifestyle diseases: An approach for translational research                                | Unrelated          |
| 68 | Raič M                                                                                 | Depression and Heart Diseases: Leading Health Problems                                                                                                            | Unrelated          |
| 69 | Whang W, Kubzansky LD, Kawachi I, Rexrode KM, Kroenke CH, Glynn RJ, et al              | Depression and Risk of Sudden Cardiac Death and Coronary Heart Disease in Women                                                                                   | Unrelated          |
| 70 | Colangelo LA, Ouyang P, Golden SH, Szklo M, Gapstur SM, Vaidya D, et al                | Do sex hormones or hormone therapy modify the relation of n-3 fatty acids with incident depressive symptoms in postmenopausal women? The MESA Study               | Unrelated          |
| 71 | Markland A, Vaughan C, Huang A, Tangpricha V, Kim E, Bubes V, et al                    | Effect of vitamin d supplementation on urinary incontinence in post-menopausal women                                                                              | Unrelated          |
| 72 | Irct2014020316465N                                                                     | Evaluating the effects of melatonin on weight and depression                                                                                                      | Unrelated          |
| 73 | Mosca L, Appel LJ, Benjamin EJ, Berra K, Chandra-Strobos N, Fabunmi RP, et al          | Evidence-based guidelines for cardiovascular disease prevention in women                                                                                          | Unrelated          |
| 74 | Silva T, Jesus M, Cagigal C, Silva C                                                   | Food with influence in the sexual and reproductive health                                                                                                         | Unrelated          |
| 75 | Fernandes CE, Neto JSDLP, Gebara OCE, De Andrade JP,                                   | I Brazilian guidelines for prevention of cardiovascular disease and influence of                                                                                  | Unrelated          |

|    |                                                                              |                                                                                                                                                                                      |           |
|----|------------------------------------------------------------------------------|--------------------------------------------------------------------------------------------------------------------------------------------------------------------------------------|-----------|
|    | Neto AMP, Pereira Filho AS, et al                                            | hormone replacement therapy in climacteric women                                                                                                                                     |           |
| 76 | Journal watch                                                                | World of Irish Nursing & Midwifery                                                                                                                                                   | Unrelated |
| 77 | Condorelli R, Vaz-Luis I                                                     | Managing side effects in adjuvant endocrine therapy for breast cancer                                                                                                                | Unrelated |
| 78 | Perez-Lopez F                                                                | The Mediterranean lifestyle and longevity                                                                                                                                            | Unrelated |
| 79 | Fouad S, El Shebini SM, Abdel-Moaty M, Ahmed NH, Hussein AMS, Essa HA, et al | Menopause anxiety and depression; how food can help? Open Access Macedonian Journal of Medical Sciences                                                                              | Unrelated |
| 80 | Dickson GM                                                                   | Menopause management: How you can do better                                                                                                                                          | Unrelated |
| 81 | La Croix AZ, Freeman EW, Ensrud K, Reed SD                                   | New clinically relevant findings from the msflash research network: The escitalopram trial                                                                                           | Unrelated |
| 82 | Chedraui P, Pérez-López FR                                                   | Nutrition and health during mid-life: searching for solutions and meeting challenges for the aging population                                                                        | Unrelated |
| 83 | Daugherty KK, Subramanian J                                                  | Pravastatin-induced hepatotoxicity in a patient with fatty liver disease: A case presentation with literature review                                                                 | Unrelated |
| 84 | Irct20191127045525N                                                          | Probiotic applications in obesity and related mood disorders                                                                                                                         | Unrelated |
| 85 | Nasrallah HA                                                                 | Psychopharmacology throughout the life cycle of women                                                                                                                                | Unrelated |
| 86 | Prakash S                                                                    | Role of antioxidants in changing of lifestyle diseases: A frontier for translational research                                                                                        | Unrelated |
| 87 | Hagey AR, Warren MP                                                          | Role of exercise and nutrition in menopause                                                                                                                                          | Unrelated |
| 88 | Galletly C, Castle D, Dark F, Humberstone V, Jablensky A, Killackey E, et al | Royal Australian and New Zealand College of Psychiatrists clinical practice guidelines for the management of schizophrenia and related disorders                                     | Unrelated |
| 89 | Tctr                                                                         | Safety evaluation and effects of consumption of functional drink containing tuna oil on working memory, emotional stresses, and aging process in perimenopausal and menopausal women | Unrelated |
| 90 | Seralthan K, Baskaran H                                                      | A short voyage towards flaxseed                                                                                                                                                      | Unrelated |
| 91 |                                                                              | Some non-hormonal therapies help control menopause symptoms, but they are not as effective as estrogen replacement therapy                                                           | Unrelated |
| 92 | Tomillero A, Moral MA                                                        | Summary                                                                                                                                                                              | Unrelated |
| 93 | Pines A                                                                      | Three alternative ways to treat VMS failed                                                                                                                                           | Unrelated |

|     |                                                                                                 |                                                                                                                                                     |                       |
|-----|-------------------------------------------------------------------------------------------------|-----------------------------------------------------------------------------------------------------------------------------------------------------|-----------------------|
| 94  |                                                                                                 | A variety of non-hormonal strategies may provide women with relief from vasomotor symptoms                                                          | Unrelated             |
| 95  | Manson J                                                                                        | Vitamin D and calcium in midlife women                                                                                                              | Unrelated             |
| 96  | Manson JAE                                                                                      | Vitamin D and cancer and cardiovascular disease: Ready for prime time? Menopause                                                                    | Unrelated             |
| 97  | Stewart M                                                                                       | Why are we Told Only Half the Story about HRT and Dementia? Positive Health                                                                         | Unrelated             |
| 98  | Wu B, Song Q, Zhang Y, Wang C, Yang M, Zhang J, et al                                           | Antidepressant activity of $\omega$ -3 polyunsaturated fatty acids in ovariectomized rats: role of neuroinflammation and microglial polarization    | Unsuitable population |
| 99  | Dornellas APS, Boldarine VT, Pedroso AP, Carvalho LOT, de andrade IS, Vulcani-Freitas TM, et al | High-Fat Feeding Improves Anxiety-Type Behavior Induced by Ovariectomy in Rats                                                                      | Unsuitable population |
| 100 | Liu XH, Hao JH, Yao ES, Cao J, Zheng XL, Yao D, et al                                           | Polyunsaturated fatty acid supplement alleviates depression-incident cognitive dysfunction by protecting the cerebrovascular and glymphatic systems | Unsuitable population |
